# Supplementary material for: Soil-Transmitted Helminth infections reduction in Bhutan: A report of 29 years of deworming
Source: PLOS journal article supplement (doi:10.1371/journal.pone.0227273), 2020-01-03
Supplement: S2 (10.1371/journal.pone.0227273.s002) [file journal.pone.0227273.s002]

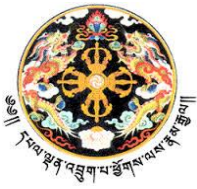

དཔལ་ལྷན་འབྲུག་གཞུང་།  
གསོ་བརྟན་ལྷན་ཁང་།  
གསོ་བའི་ཞིབ་འཇོལ་ གུན་རྒྱུན་རྒྱུ་ལེན་གྱི་ ལོ་དཔྱད་ལྷན་ཁང་།  
ཐིམ་ཕུག་  
ཐིམ་ཕུག་

ROYAL GOVERNMENT OF BHUTAN  
MINISTRY OF HEALTH  
RESEARCH ETHICS BOARD OF HEALTH  
THIMPHU : BHUTAN  
P.O. BOX : 726

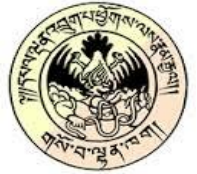

REBH/Approval/2017/033

12<sup>th</sup> April, 2017

**REBH Approval Letter**

|                                                                                                                                                                                                                                                                                                                                                                                                                                                                                                                                                                                                                                                                                                                                                                                                                                                                                                                                                                                                                                                                                               |                                                                                                                           |
|-----------------------------------------------------------------------------------------------------------------------------------------------------------------------------------------------------------------------------------------------------------------------------------------------------------------------------------------------------------------------------------------------------------------------------------------------------------------------------------------------------------------------------------------------------------------------------------------------------------------------------------------------------------------------------------------------------------------------------------------------------------------------------------------------------------------------------------------------------------------------------------------------------------------------------------------------------------------------------------------------------------------------------------------------------------------------------------------------|---------------------------------------------------------------------------------------------------------------------------|
| <p><b>PI:</b> Mr. Tshering Dukpa<br/><b>Institute:</b> Faculty of Nursing and Public Health(FNPH), KGUMSB, Thimphu</p>                                                                                                                                                                                                                                                                                                                                                                                                                                                                                                                                                                                                                                                                                                                                                                                                                                                                                                                                                                        | <p><b>Study Title:</b><br/>Prevalence and Intensity of Soil Transmitted Helminthiasis among School Children in Bhutan</p> |
| <p><b>Co-Investigators:</b> 1. Dr. Nidup Dorji; 2. Dr. Diki Wangmo; 3. Mr. Wangchuk Dukpa; 4. Mr. Sangay Thinley; 5. Ms. Passang Lhamo; 6. Mr. Karma Tshering; 7. Ms. Kinley Gyem 8. Dr. Palden Wangchuck; and 9. Mr. Tshering Dorji</p>                                                                                                                                                                                                                                                                                                                                                                                                                                                                                                                                                                                                                                                                                                                                                                                                                                                      |                                                                                                                           |
| <p><b>Mode of Review:</b> ✓ Full board review (Meeting no. 01/2017-32nd) for version 1 and Expedite review for version 2 and 3</p>                                                                                                                                                                                                                                                                                                                                                                                                                                                                                                                                                                                                                                                                                                                                                                                                                                                                                                                                                            |                                                                                                                           |
| <p><b>Decision:</b> Approved (<b>Note: Abide by the conditions of approval</b>)</p>                                                                                                                                                                                                                                                                                                                                                                                                                                                                                                                                                                                                                                                                                                                                                                                                                                                                                                                                                                                                           |                                                                                                                           |
| <p><b><u>Conditions for Approval</u></b></p> <ol style="list-style-type: none"> <li>1. <i>This approval is granted for the scientific and ethical soundness of the study. The PI shall be responsible to seek all other clearances/approvals required by law/policy including permission from the study sites before conducting the study.</i></li> <li>2. <i>Report serious adverse events to REBH within 10 working days after the incident and unexpected events should be included in the continuing review report or the final report.</i></li> <li>3. <i>Any changes to the proposal or to the attachments (informed consent and research tools such as forms) should be approved by REBH before implementation.</i></li> <li>4. <i>Final report of the study should be submitted to REBH at the end of the study for protocol file closure.</i></li> <li>5. <i>This approval is valid through 11/04/2018. If the study has to continue beyond the approved period the PI has to apply for the continuing review two months before the validity of the approval expires.</i></li> </ol> |                                                                                                                           |

(Dr. Tashi Tobgay)  
Chairperson

For further information please contact: REBH Member Secretary,  
[msquruna@health.gov.bt](mailto:msquruna@health.gov.bt)/[tashidema@health.gov.bt](mailto:tashidema@health.gov.bt): Tel: +975-2-322602 ext 333
